# Supplementary material for: Simultaneous profiling and cultivation of the skin microbiome of healthy young adult skin for the development of therapeutic agents
Source: PubMed Central journal article supplement — Heliyon. 2020 Apr 20;6(4):e03700. doi: 10.1016/j.heliyon.2020.e03700 (PMC7176942; doi:10.1016/j.heliyon.2020.e03700), 2020-04-20
Supplement: mmc1.pdf [file mmc1.pdf]

**SUPPLEMENTARY FILE 1. Morphological and molecular identification of cultivable skin microbiota**

| Identified Strain                  | Accession Number | Colony Morphology |                 |            |                       |           |                       |            | Cellular morphology                      |
|------------------------------------|------------------|-------------------|-----------------|------------|-----------------------|-----------|-----------------------|------------|------------------------------------------|
|                                    |                  | Pigment           | Shape           | Haemolysis | Elevation             | Margin    | Surface               | Gram (+/-) |                                          |
| <b>Aerobic</b>                     |                  |                   |                 |            |                       |           |                       |            |                                          |
| <i>Staphylococcus capitis</i>      | MK968314.1       | Dull white        | Small circular  | –          | Raised (low convex)   | Entire    | Smooth and glistening | +          | Coccus in irregular cluster (grape-like) |
| <i>Staphylococcus warneri</i>      | MK968315.1       | White             | Medium circular | +          | Umbonate              | Irregular | Smooth and glistening | +          | Coccus in irregular cluster (grape-like) |
| <i>Kocuria rhizophila</i>          | MK968317.1       | Yellow            | Curled          | –          | -                     | Irregular | Rough and dull        | +          | Coccus in irregular cluster (grape-like) |
| <i>Micrococcus luteus</i>          | MK968318.1       | Yellow            | Medium circular | +          | Umbonate              | Entire    | Smooth and glistening | +          | Coccus in irregular cluster (grape-like) |
| <i>Micrococcus yunnanensis</i>     | MK968321.1       | Pale yellow       | Medium circular | –          | convex                | Entire    | Smooth and glistening | +          | Tetrad                                   |
| <i>Staphylococcus aureus</i>       | MK968322.1       | Oranye            | Small circular  | –          | Raised (low convex)   | Irregular | Smooth and glistening | +          | Coccus in irregular cluster (grape-like) |
| <i>Staphylococcus hominis</i>      | MK968325.1       | White             | Curled          | +          | -                     | Irregular | Rough and dull        | +          | Tetrad                                   |
| <i>Corynebacterium mucifaciens</i> | MK968326.1       | Yellow            | Irregular       | +          | Concave (crateriform) | Entire    | Smooth and glistening | +          | Curved rods                              |

|                                     |            |               |                |   |                     |           |                       |   |                                          |
|-------------------------------------|------------|---------------|----------------|---|---------------------|-----------|-----------------------|---|------------------------------------------|
| <i>Staphylococcus saprophyticus</i> | MK968316.1 | Beige         | Small circular | – | Convex              | Entire    | Smooth and glistening | + | Coccus in irregular cluster (grape-like) |
| <b>Anaerobic</b>                    |            |               |                |   |                     |           |                       |   |                                          |
| <i>Staphylococcus saprophyticus</i> | MK968331.1 | Broken white  | Large circular | + | Raised (low convex) | Irregular | Smooth and glistening | + | Tetrad                                   |
| <i>Staphylococcus haemolyticus</i>  | MK968319.1 | Greyish-white | Circular       | + | Raised (low convex) | Entire    | Smooth and glistening | + | Single coccus                            |
| <i>Micrococcus sp</i>               | MK968330.1 | Yellow        | Circular       | – | Convex              | Entire    | Smooth and glistening | + | Coccus in pair                           |
| <i>Staphylococcus capitis</i>       | MK968333.1 | Greyish-white | Round          | – | Raised (low convex) | Entire    | Smooth and glistening | + | Coccus in irregular cluster (grape-like) |
